# Supplementary material
Source: PubMed Central journal article supplement (PMC8092731)
Supplement: JCM.01938-20-s0001.pdf [file JCM.01938-20-s0001.pdf]

**Fig S1.** Nitrocefina-based hydrolysis of MSSA strains after 30 minutes in the presence and absence of ampicillin.

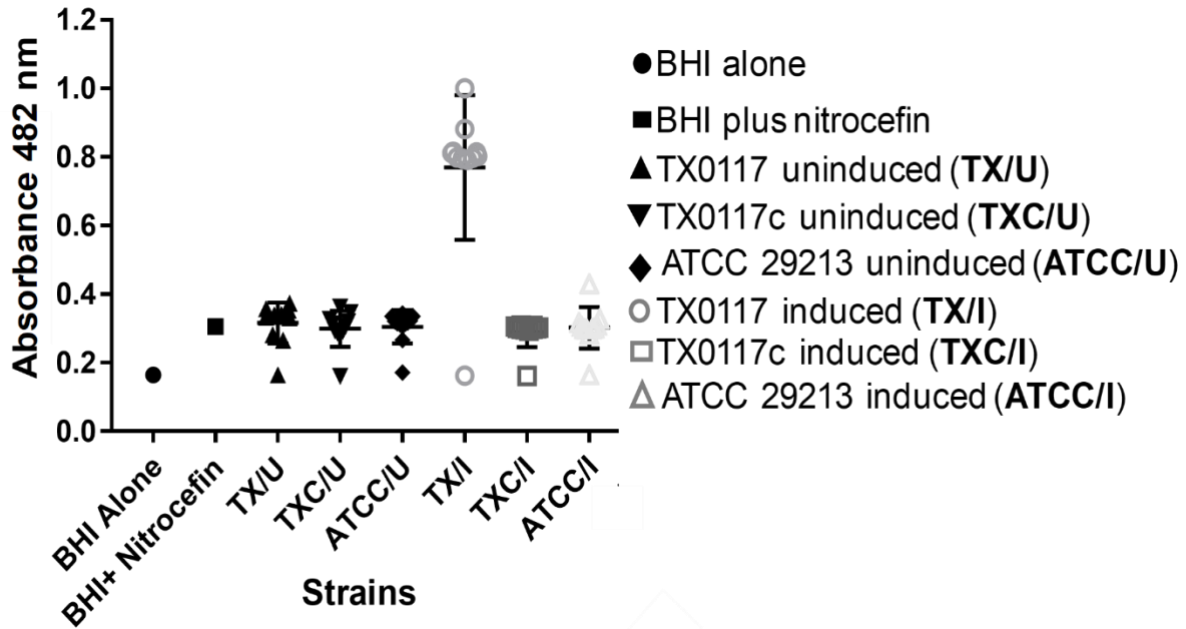

TX0117 (exhibits the CzIE), TX0117c (cured derivative of TX0117 without CzIE) and ATCC29213 (BlaZ but no CzIE). Symbols represent the number of repetitions of each experiment. Statistically significant differences (all  $p < 0.001$ ) were observed in ODs after 30 min of incubation for TX0117 (CzIE) vs TX0117c (no CzIE) and vs. ATCC 29213 (no CzIE).
