# Supplementary material
Source: PubMed Central journal article supplement (PMC8092731)
Supplement: JCM.01938-20-s0003.pdf [file JCM.01938-20-s0003.pdf]

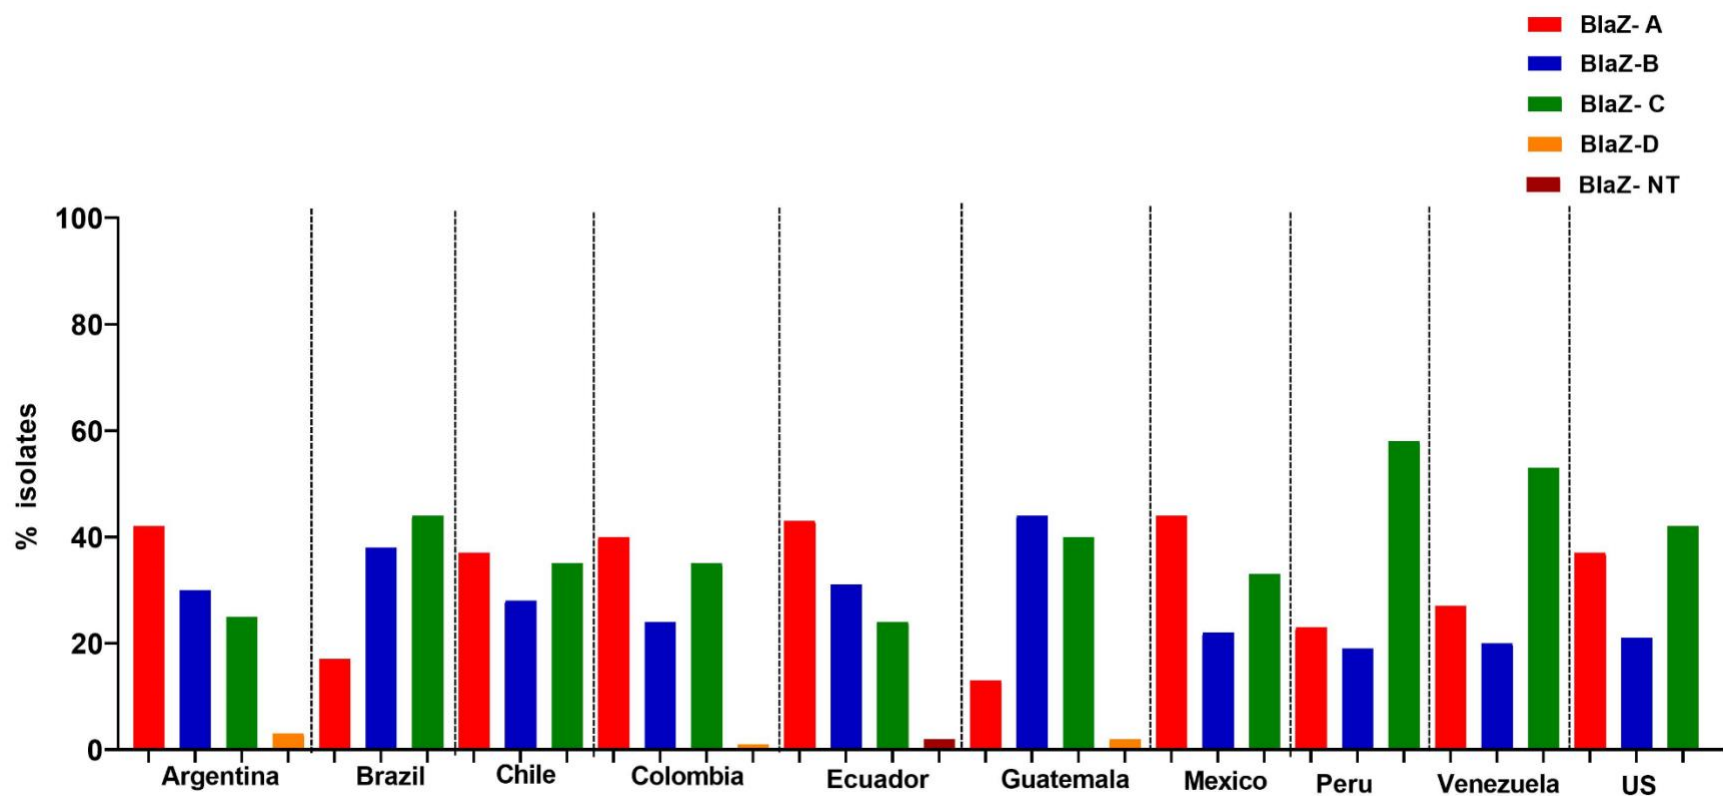

**Fig S3. BlaZ types in MSSA isolates from bloodstream in Latin-American and the US hospitals.** Argentina n=71, Brazil n=63, Chile n=68, Colombia n=153, Ecuador n=49 Guatemala n=45, Mexico n=9, Peru n=43, Venezuela n =15, US N=38. Columns in red are showing different types of BlaZ: red type-A, blue type-B, green type-C, orange type-D, brown color Non-typeable (K at 119 and S at 2017 in BlaZ). Variations in the prevalence of BlaZ types were observed across different countries. BlaZ type A was prevalent in Argentina (42%), Colombia (40%), Ecuador (43%) and Mexico (44%). Whereas, type C was predominant in Brazil (38%), Peru (58%) and Venezuela (53%). Moreover, similar frequencies of BlaZ types A and C were found in Chile (25 and 24%, respectively). In the US, type C (42%) was the most frequent followed by type A (37%). While similar frequency of BlaZ Types B and C was observed in Guatemala (44% and 40%, respectively).
